# Supplementary material
Source: HighWire-hosted journal article supplement (https://gut.bmj.com/content/gutjnl-2023-331532)
Supplement: inline-supplementary-material-2 [file inline-supplementary-material-2.pdf]

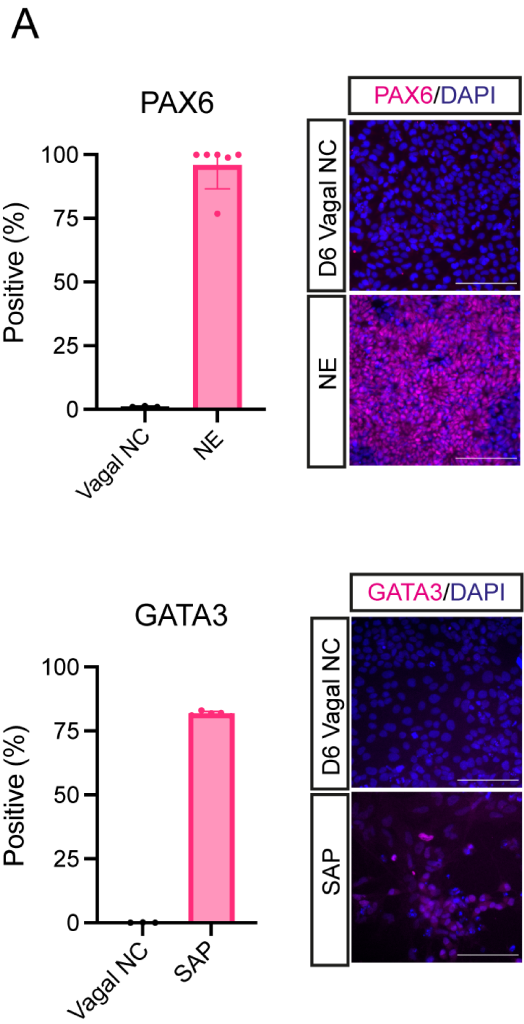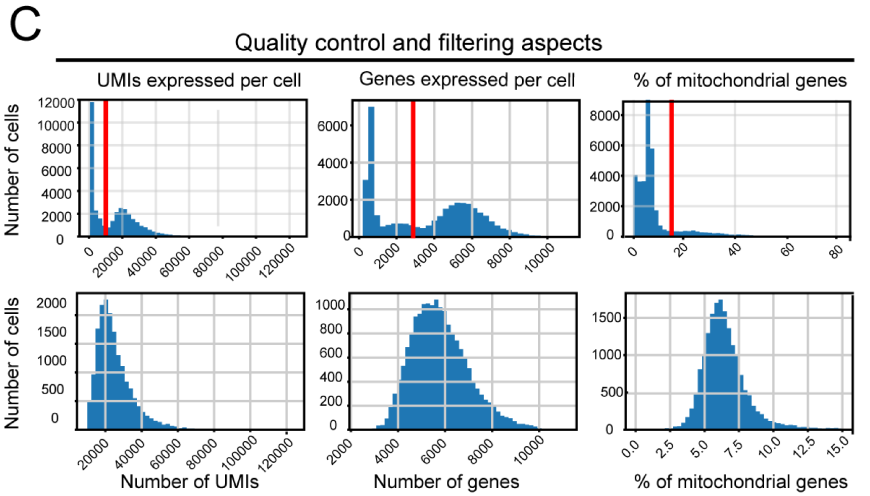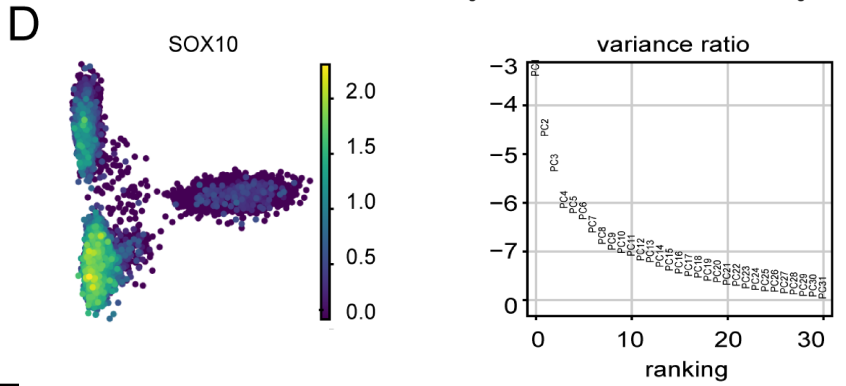

**E**

Removal doublets with Scrublet

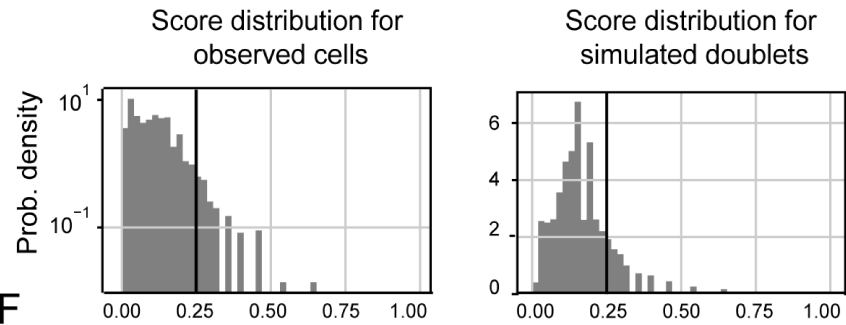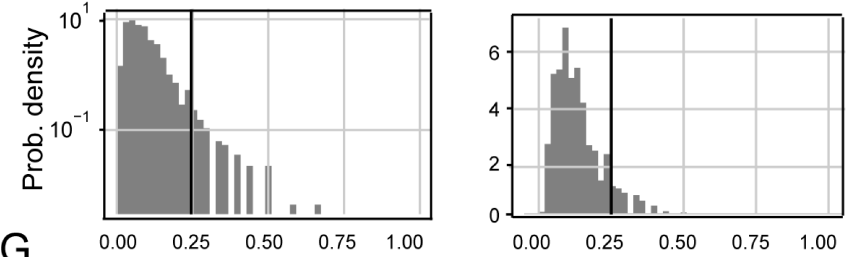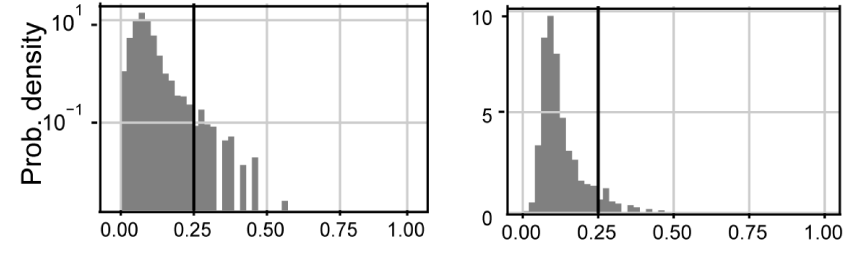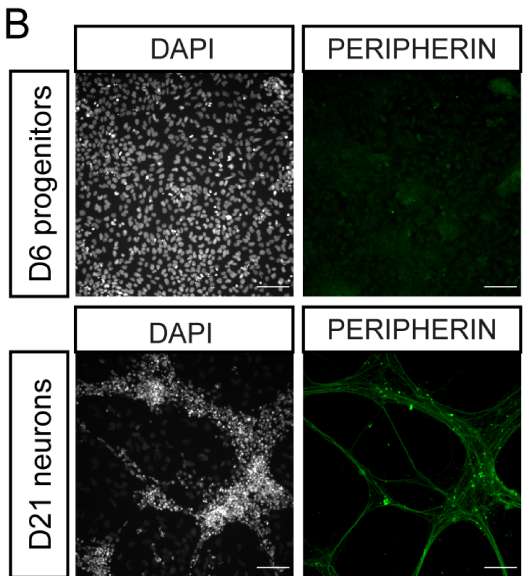

Doublet score of observed cells

Doublet score of simulated doublets
