# Supplementary material
Source: HighWire-hosted journal article supplement (https://gut.bmj.com/content/gutjnl-2023-331532)

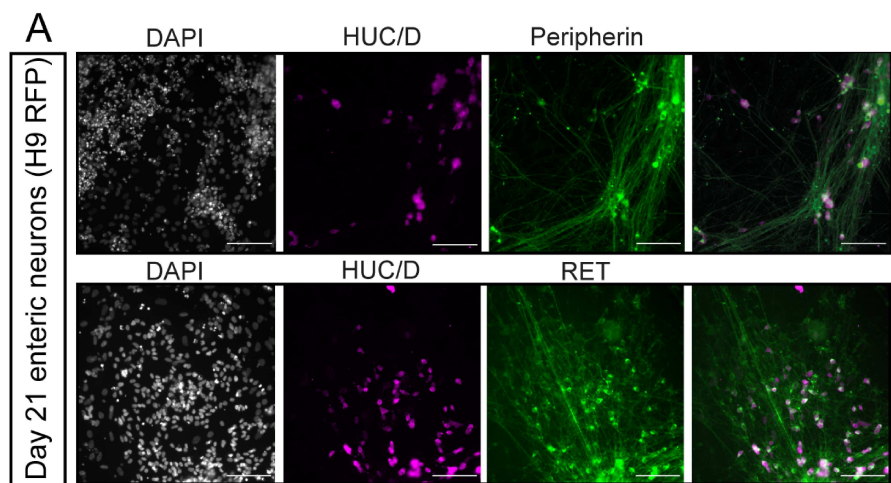

**B** DAY 21 enteric neurons (H9)

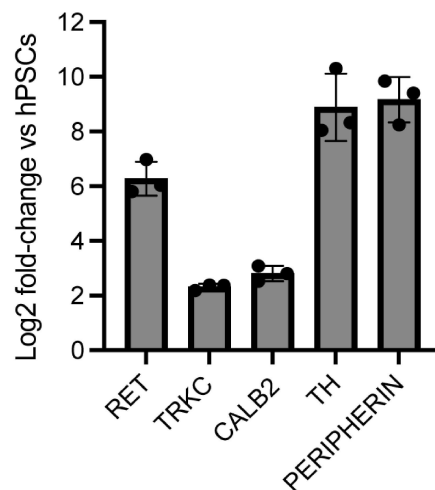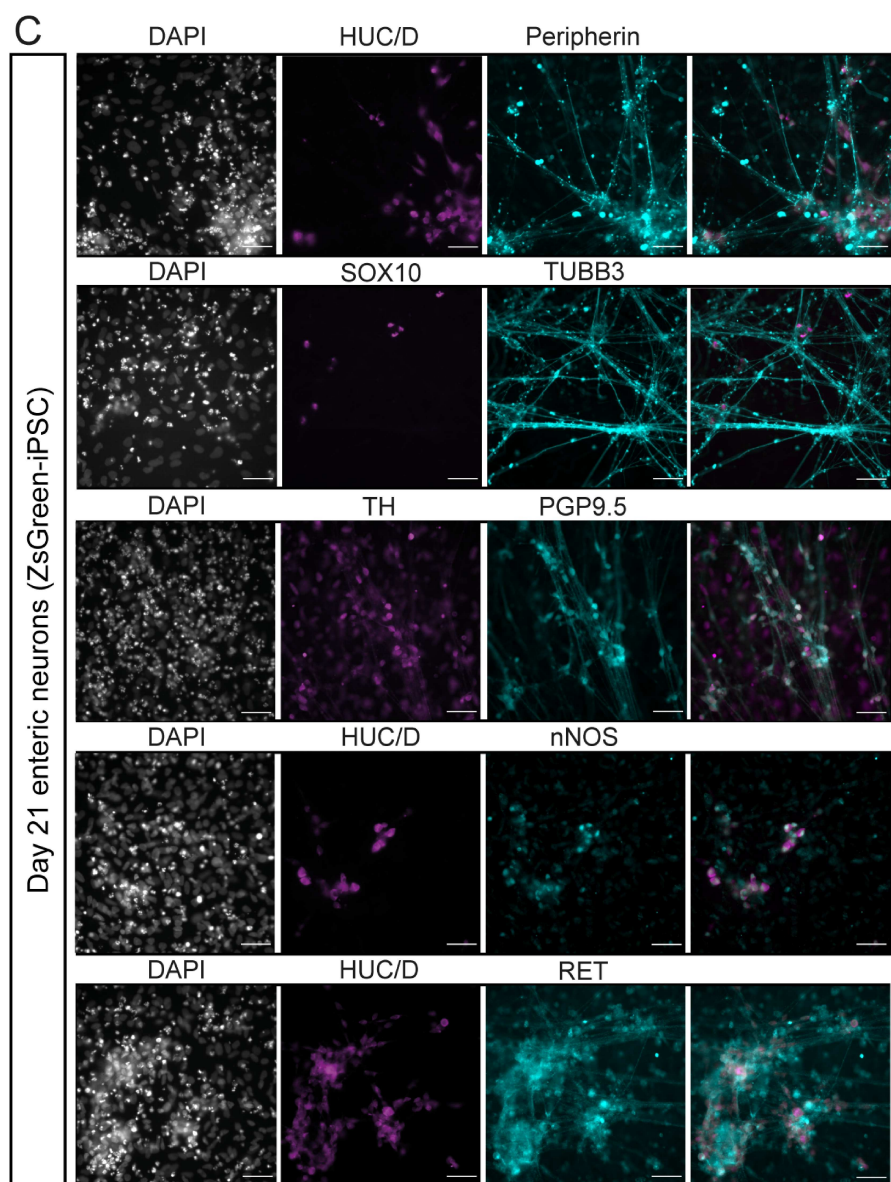

**D**

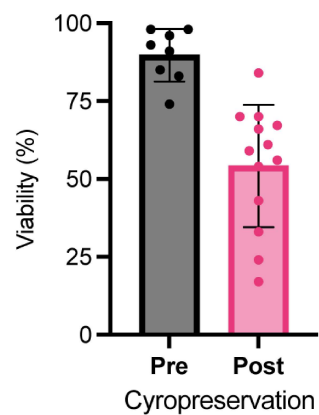

**E**

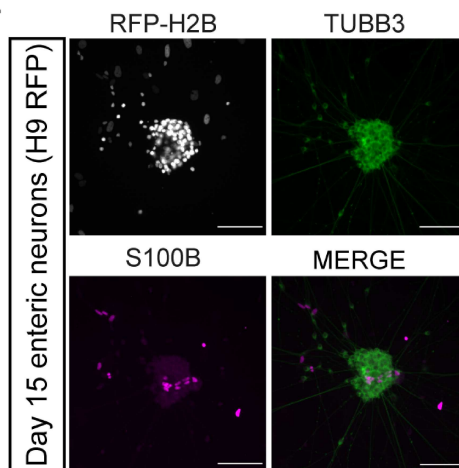

Supplement: inline-supplementary-material-3 [file inline-supplementary-material-3.pdf]
